# Supplementary material for: The SRG rat, a Sprague-Dawley Rag2/Il2rg double-knockout validated for human tumor oncology studies
Source: PubMed Central journal article supplement (PMC7540894; doi:10.1371/journal.pone.0240169), 2020-10-07

Figure 4B

AR

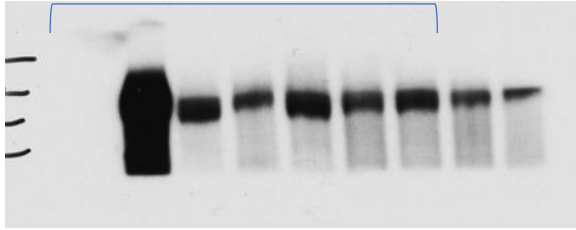

GAPDH

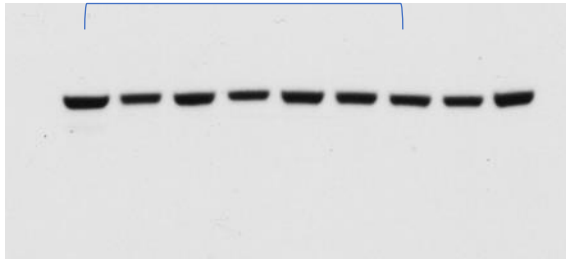

Figure 4C

AR

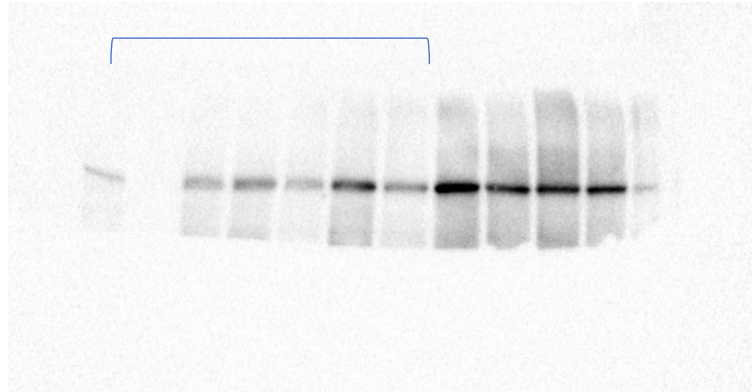

GAPDH

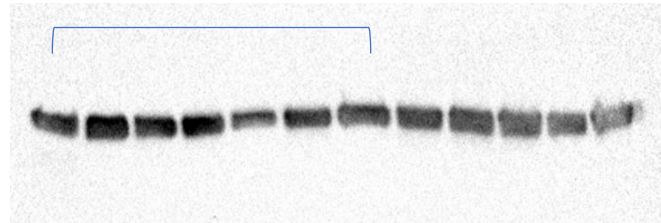

Supplement: pone.0240169.s004.pdf [file pone.0240169.s004.pdf]
